# Supplementary material for: Elevated SP-1 Transcription Factor Expression and Activity Drives Basal and Hypoxia-induced Vascular Endothelial Growth Factor (VEGF) Expression in Non-Small Cell Lung Cancer
Source: PubMed Central journal article supplement — J Biol Chem. 2012 Sep 19;287(47):39967–81. doi: 10.1074/jbc.M112.397042 (PMC3501049; doi:10.1074/jbc.m112.397042), 2012-09-19

## **Supplementary data figure legends**

### **Figure S1**

NSCLC cell lines , A549 (A), H460 (B), H1299 (C) and MOR/P (D) were transfected with 0.1ug of VEGF promoter luciferase constructs in either normoxic (open bars) conditions or 1% [O<sub>2</sub>] hypoxic conditions (closed bars) for 20hrs and assayed for luciferase activity. All measurements represent the mean +/- SEM of three independent experiments.

### **Figure S2**

NSCLC cell lines , A549 (A), H460 (B), H1299 (C) and MOR/P (D) were transfected with 0.1ug pGL4-HRE-LUC construct in either normoxic (open bars) conditions or 1% [O<sub>2</sub>] hypoxic conditions (closed bars) for 20hrs and assayed for luciferase activity. All measurements represent the mean +/- SEM of three independent experiments.

# Supplementary data ,S1

(VEGF promoter reporter , normoxia , hypoxia 20hr)

(A)

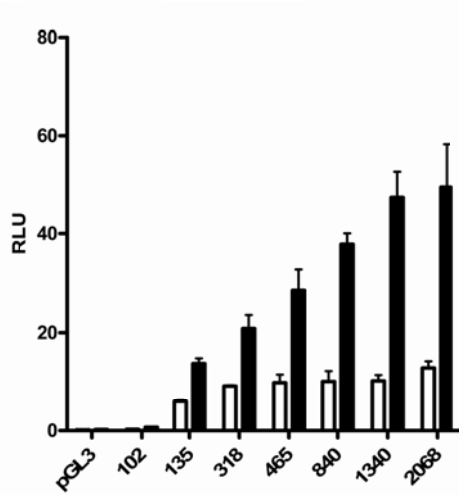

(B)

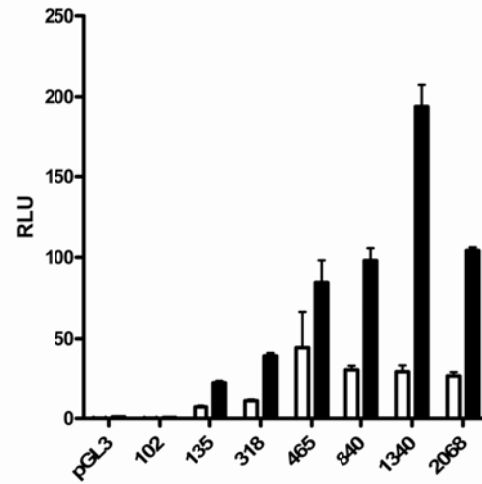

(C)

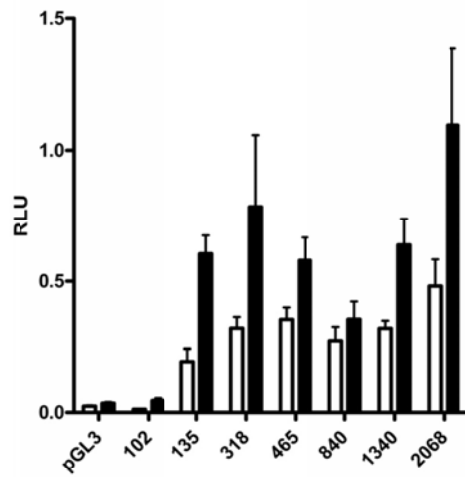

(D)

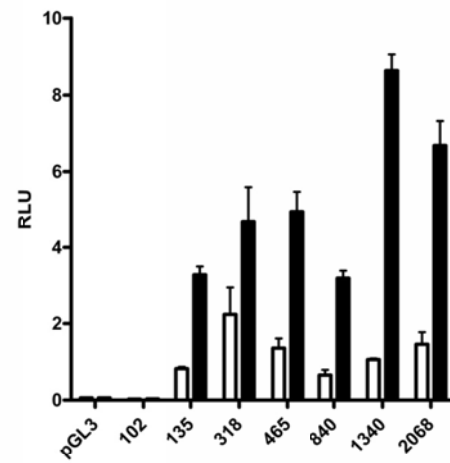

## Supplementary data , S2

(HRE-LUC response to hypoxia for 20hrs)

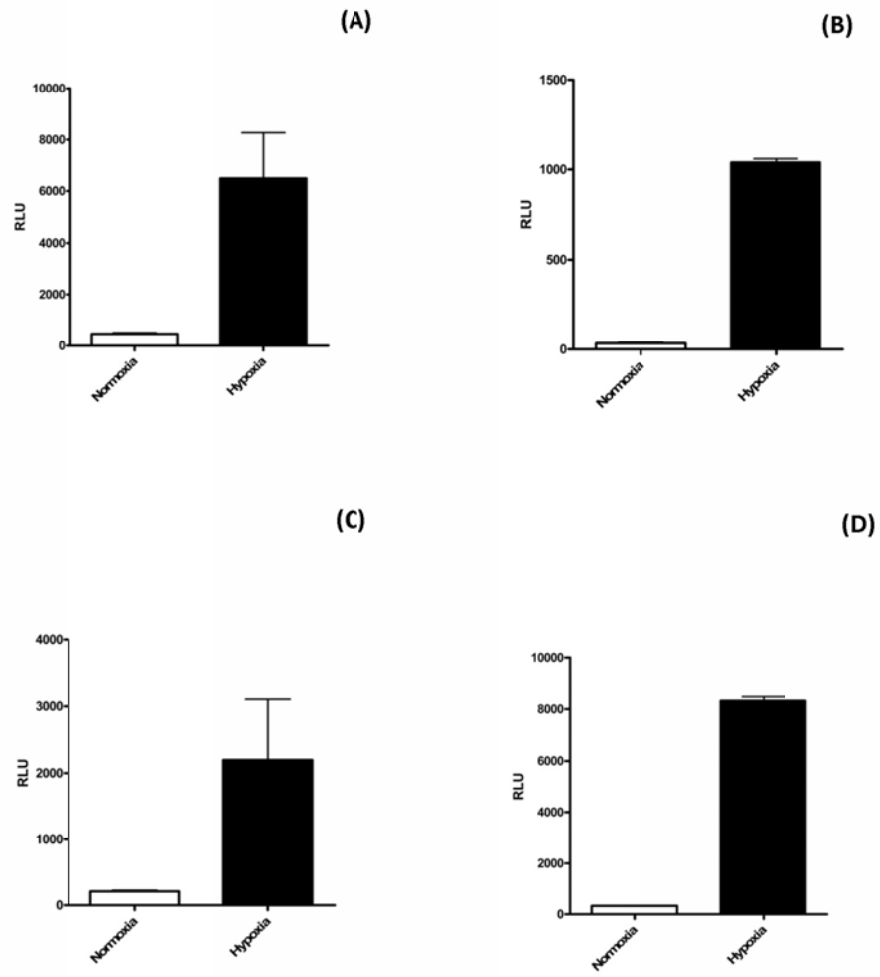

Supplement: supp_M112.397042_jbc.M112.397042-1.pdf [file supp_M112.397042_jbc.M112.397042-1.pdf]
